# Supplementary material for: Multiple CDK inhibitor dinaciclib suppresses neuroblastoma growth via inhibiting CDK2 and CDK9 activity
Source: PubMed Central journal article supplement (PMC4932496; doi:10.1038/srep29090), 2016-07-05
Supplement: srep29090-s1.pdf [file srep29090-s1.pdf]

## Supplemental information

### Multiple CDK inhibitor Dinaciclib suppresses neuroblastoma growth via inhibiting CDK2 and CDK9 activity

Zhenghu Chen<sup>1,2</sup>, Zhenyu Wang<sup>3,4</sup>, Jonathan C. Pang<sup>2</sup>, Yang Yu<sup>2</sup>, Shayahati Bieerkehazhi<sup>3,5</sup>, Jiaxiong Lu<sup>1,2</sup>, Ting Hu<sup>2,6</sup>, Yanling Zhao<sup>2</sup>, Xin Xu<sup>2</sup>, Hong Zhang<sup>3</sup>, Joanna S. Yi<sup>2</sup>, Shangfeng Liu<sup>1,7\*</sup>, and Jianhua Yang<sup>2\*</sup>

<sup>1</sup>Department of Ophthalmology, Shanghai Tenth People's Hospital, Tongji University School of Medicine, Shanghai 200072, P. R. China

<sup>2</sup>Texas Children's Cancer Center, Department of Pediatrics, Dan L. Duncan Cancer Center, Baylor College of Medicine, Houston, Texas 77030, USA

<sup>3</sup>Department of Pathology, University of Texas MD Anderson Cancer Center, Houston, Texas 77030, USA

<sup>4</sup>Department of Breast Surgery, The second hospital of Jilin University, Changchun, Jilin 130041, China

<sup>5</sup>College of Public Health, Xinjiang Medical University, Urumqi 830054, China

<sup>6</sup>Department of Neurosurgery, Xiangya Hospital, Central South University, Changsha 410008, China

<sup>7</sup>Department of Stomatology, Huashan Hospital, Fudan University, Shanghai 200040, China

\*Correspondence to:

Shangfeng Liu, Department of Stomatology, Huashan Hospital, Fudan University, Shanghai 200040, China. Tel/fax: +86-21-6562662. Email: shangfengliufudan@163.com. Jianhua Yang, Texas Children's Cancer Center, Department of Pediatrics, Dan L. Duncan Cancer Center, Baylor College of Medicine, Houston, TX 77030. USA. Phone: 1-832-824-4572, Fax: 1-832-825-1206. Email: jianhuay@bcm.edu;

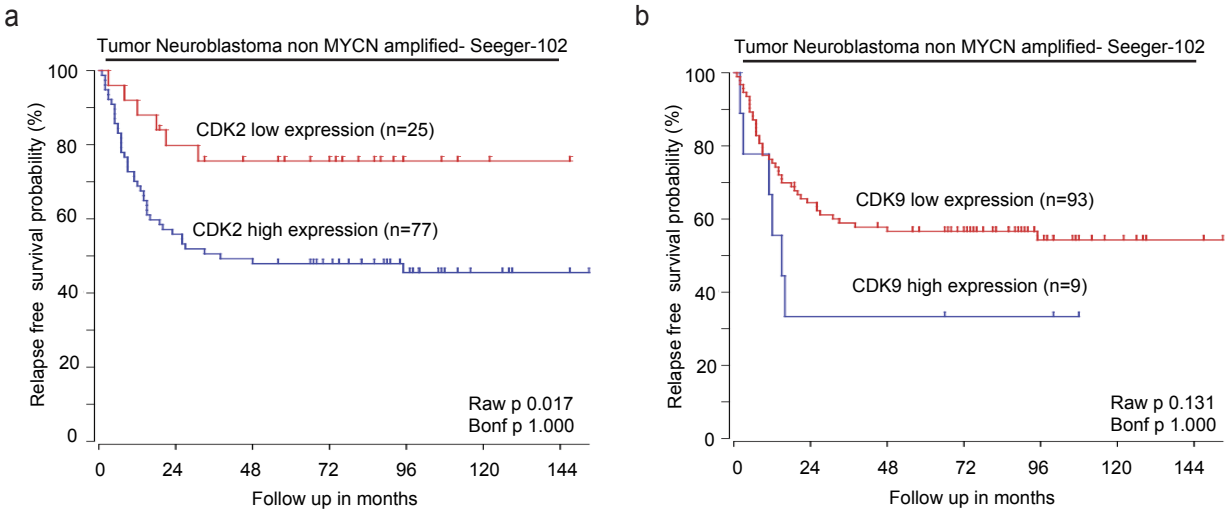

**Supplemental Figure S1. Correlations of the expressions of CDK2 and CDK9 with the outcomes in NB patients.** (a) Relapse-free survival probability for NB patients with high CDK2 expression (blue; n=77) and low CDK2 expression (red; n=25) (Seeger-102 data set). (b) Relapse-free survival probability for NB patients with high CDK9 expression (blue; n=9) and low CDK9 expression (red; n=93) (Seeger-102 data set).

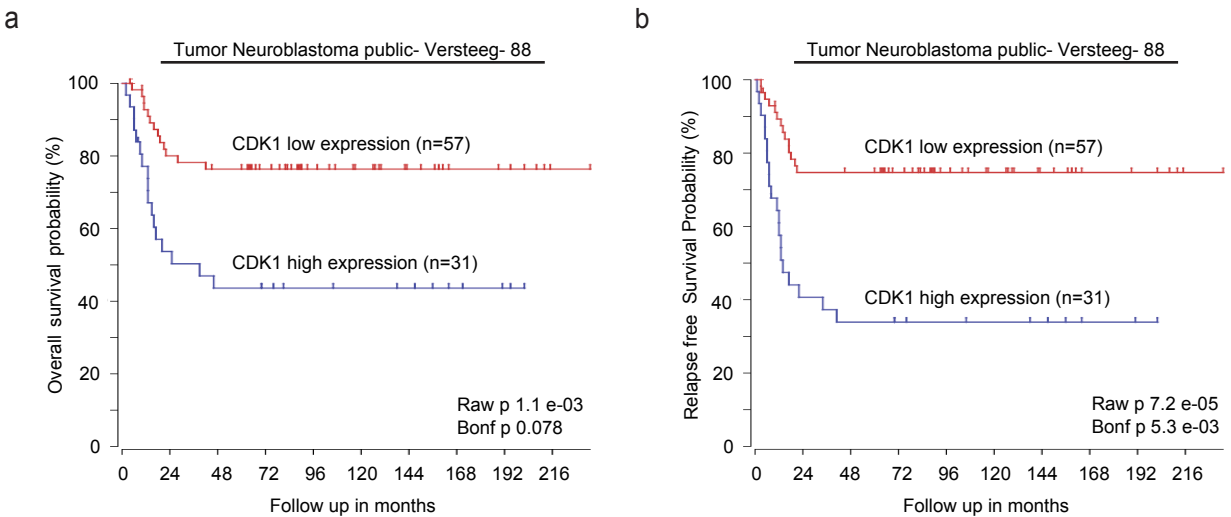

**Supplemental Figure S2. Correlations of the expressions of CDK1 with the outcomes in NB patients.** (a) Overall survival probability for NB patients with high CDK1 expression (blue; n=31) and low CDK1 expression (red; n=57) (Versteeg-88 data set). (b) Relapse-free survival probability for NB patients with high CDK1 expression (blue; n=31) and low CDK1 expression (red; n=57) (Versteeg-88 data set).

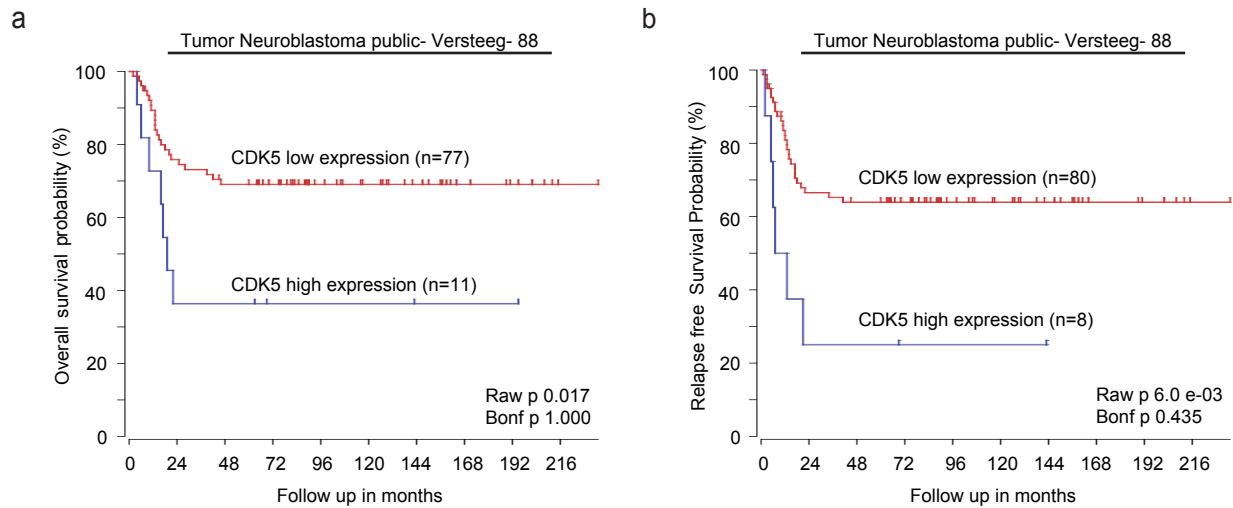

**Supplemental Figure S3. Correlations of the expressions of CDK5 with the outcomes in NB patients.** (a) Overall survival probability for NB patients with high CDK5 expression (blue; n=11) and low CDK5 expression (red; n=77) (Versteeg-88 data set). (b) Relapse-free survival probability for NB patients with high CDK5 expression (blue; n=8) and low CDK5 expression (red; n=80) (Versteeg-88 data set).

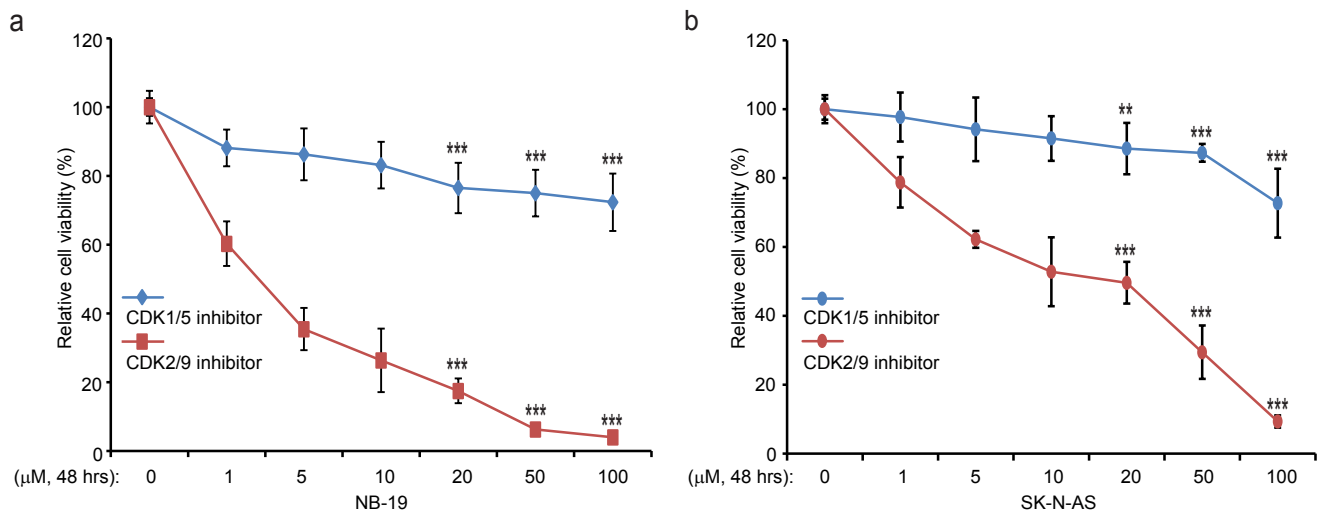

**Supplemental Figure S4. The cytotoxic effects of CDK1/5 inhibitor and CDK2/9 inhibitor on NB-19 and SK-N-AS cells.** NB-19 (a) and SK-N-AS (b) cells were treated with increasing concentrations of either CDK1/5 dual inhibitor or CDK2/9 dual inhibitor for 48 hrs. Cell viability was then measured by the Cell Counting Kit-8 (CCK-8) assay. P-values <0.01 (\*\*) or P <0.001 (\*\*\*) (Student's t-test, two-tailed) were indicated.

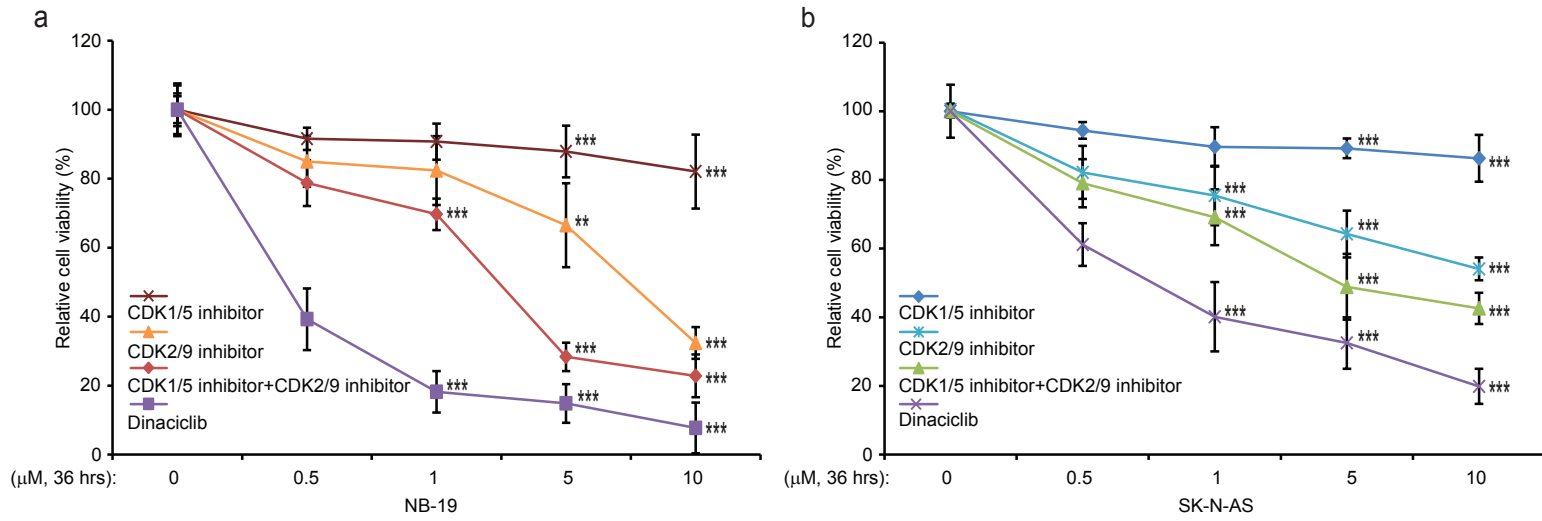

**Supplemental Figure S5. The comparison of the cytotoxic effects caused by CDK inhibitors on NB-19 and SK-N-AS cells.** NB-19 (a) and SK-N-AS (b) cells were treated with increasing concentrations of CDK1/5 dual inhibitor, or CDK2/9 dual inhibitor, or their combinations, or Dinaciclub for 36 hrs. Cell viability was then measured by the Cell Counting Kit-8 (CCK-8) assay. P-values <0.001 (\*\*\*) (Student's t-test, two-tailed) were indicated.
